1 Intermolecular interactions drive protein adaptive and co-adaptive evolution at both species and  
2 population levels

3 Junhui Peng, Li Zhao

4 Laboratory of Evolutionary Genetics and Genomics, The Rockefeller University, New York, NY 10065,  
5 USA

6 \*Correspondence to: [lzhao@rockefeller.edu](mailto:lzhao@rockefeller.edu)

## 8 **Abstract**

9 Proteins are the building blocks for almost all the functions in cells. Understanding the molecular  
10 evolution of proteins and the forces that shape protein evolution is an essential step in understanding the  
11 basis of function and evolution. Previous studies have shown that adaptation occurs frequently at the  
12 protein surface, such as in genes involved in host-pathogen interactions. However, it remains unclear  
13 whether adaptive sites are distributed randomly or at regions that are associated with particular structural  
14 or functional characteristics across the genome, since many of the proteins lack structural or functional  
15 annotations. Here, we seek to tackle this question by combining large-scale bioinformatic prediction,  
16 structural analysis, phylogenetic inference, and population genomic analysis of *Drosophila* protein-coding  
17 genes. Although adaptation is more relevant to function-related rather than structure-related properties,  
18 we observed that physical interactions may play a role in the co-adaptation of fast-adaptive proteins.  
19 Importantly, protein-protein and protein-DNA interaction sites are hotspots for protein adaptive evolution,  
20 regardless of the levels of intrinsic structural disorder or relative solvent accessibility. We found that  
21 strongly differentiated amino acids across geographic regions in protein coding genes are mostly adaptive,  
22 which may contribute to the long-term adaptive evolution. This strongly indicates that a number of  
23 adaptive sites are repeatedly mutated and selected in evolution, in the past, present, and maybe future. Our  
24 results suggest important roles of intermolecular interactions and co-adaptation in the adaptive evolution  
25 of proteins both at the species and population levels.

## 27 **Introduction**

28 Natural selection plays an important role in molecular evolution of protein sequences. Recent advances in  
29 genome sequencing and reliable inference methods at both phylogenetic and population levels have  
30 enabled fast and robust estimation of evolutionary rates and adaptation driven by natural selection. In  
31 addition, the increased availabilities of structural and functional data of proteins have made it possible to  
32 study how structural and functional constraints affect protein sequence evolution and adaptation. It is now  
33 well established that different proteins and different sites within a protein have varying rates of evolution  
34 and adaptation due to both structural and functional constraints (Echave et al., 2016; Kosiol et al., 2008;

35 Lindblad-Toh et al., 2011; Zhang and Yang, 2015). For example, genes that are highly expressed or  
36 perform essential functions are under strong purifying selection and tend to evolve slowly (Drummond et  
37 al., 2005; Moutinho et al., 2019; Pál et al., 2001; Zhang and He, 2005; Zhang and Yang, 2015); genes  
38 involved in host-pathogen interactions, e.g., immune responses and antiviral responses, show  
39 exceptionally high rates of adaptive changes (Enard et al., 2016; Nielsen et al., 2005; Obbard et al., 2009;  
40 Palmer et al., 2018; Sackton et al., 2007; Sironi et al., 2015; Uricchio et al., 2019); and residues that are  
41 intrinsically disordered or at the protein surface are fast evolving and has been proved to be hotspots of  
42 adaptive evolution (Afanasyeva et al., 2018; Goldman et al., 1998; Lin et al., 2007; Moutinho et al., 2019;  
43 Ramsey et al., 2011). More recently, Slodkowitz & Goldman (Slodkowitz and Goldman, 2020)  
44 employed genomic-scale integrated structural and phylogenetic evolutionary analysis in mammals and  
45 showed that positively selected residues are clustered near ligand binding sites, especially in proteins that  
46 are associated with immune responses and xenobiotic metabolism. However, vast majority of the work  
47 focused on differences at the species level, it is unclear how much of the polymorphic changes within a  
48 species may contribute to long-term evolution.

49         Although evidence have shown that adaptation is more likely to occur at intrinsically disordered  
50 regions and clustered at the surface of proteins, the functional properties of adaptation in the genomic and  
51 population scale remains unclear. Moreover, due to lack of structural and functional information of many  
52 proteins in the genome, the underlying mechanism derived from current studies might be incomplete.  
53 Here, we systematically investigated the evolution and adaptation of protein-coding genes in *Drosophila*  
54 *melanogaster* by comparing it to its closely related species and their own populations, in order to  
55 distinguish the main factors that impact the evolution and adaptation at the protein-coding level. We applied  
56 large-scale bioinformatic and structural analysis to obtain structural and functional properties of proteins.  
57 We then classified residues into different structural and functional sites. By comparing rates of sequence  
58 evolution and adaptation between different proteins and different sites, we were able to locate hotspots of  
59 adaptation at the genome scale. Although adaptation is more sensitive to functional properties rather than  
60 structural properties, we found that putative binding regions including allosteric sites at protein surface  
61 show higher rates of adaptation than other sites. For proteins that are under fast-adaptive evolution, we  
62 showed that they tend to interact with each other more frequently than random expectations and are often  
63 associated with reproduction, immunity, and environmental information processing in *D. melanogaster*.  
64 In addition, we showed that interacting proteins in *D. melanogaster* might undergo co-adaptive evolution.  
65 Furthermore, we hypothesize that molecular interactions or physical interactions might be an important  
66 mechanism that contribute to the adaptive and co-adaptive evolution in *D. melanogaster* genome. At last,  
67 we showed that many non-synonymous SNPs contributing to short-term adaptation are overlapped with

68 SNPs contributing to long-term adaptive evolution, suggesting that a subset of SNPs on the genomes are  
69 constantly utilized for adaptive purpose.

70

## 71 **Results**

### 72 **Putative molecular interaction sites are hotspots for protein adaptive evolution**

73 To uncover the main factors that impact the evolutionary rates of genes, we analyzed 13,528 protein-  
74 coding genes in *D. melanogaster* using genome data from *melanogaster* subgroup species and *D.*  
75 *melanogaster* population genomics data from 205 inbred lines from Drosophila Genetic Reference Panel,  
76 Freeze 2.0, DGRP2 (Huang et al., 2014). We applied a maximum likelihood method (Yang, 2007) to  
77 compute dN/dS ratio ( $\omega$ ) using the protein-coding sequences of five closely related melanogaster  
78 subgroup species (*D. melanogaster*, *D. simulans*, *D. sechellia*, *D. yakuba* and *D. erecta*). We estimated  
79 the proportions of adaptive changes ( $\alpha$ ) in each gene by applying an extension of MK test named  
80 asymptotic MK (Messer and Petrov, 2013; Uricchio et al., 2019) using *D. simulans* as outgroup. We then  
81 calculated the rate of adaptive changes ( $\omega_a$ ) of each gene by multiplying  $\omega$  to  $\alpha$  ( $\omega_a = \alpha\omega$ ) (Moutinho et  
82 al., 2019) using *D. yakuba* as the outgroup species (See methods). The rate of nonadaptive changes can be  
83 further calculated by  $\omega_{na} = \omega - \omega_a$ . Finally, we successfully assigned  $\omega$  to 12,118 protein coding genes and  
84  $\omega_a$  and  $\omega_{na}$  to 7,192 genes. For each of *D. melanogaster* genes subjecting the same pipeline of analysis,  
85 we further obtained 17 different structural or functional properties (see Methods and supplementary file  
86 S1). We calculated Pearson's correlations of  $\omega$ ,  $\omega_a$  and  $\omega_{na}$  with all these properties (Table S1). We  
87 showed that many of these genome-wide correlations were expected according to previous studies  
88 (Supplement Information, section *Impact of gene properties on evolution of protein-coding genes in D.*  
89 *melanogaster*, Table S1). Interestingly, among these properties, we found that some previously not  
90 reported properties, fractions of molecular-interaction sites (PPI-site ratio, ratio of residues involved in  
91 protein-protein interactions, and DNA-site ratio, ratio of residues involved in protein-DNA interactions)  
92 strongly positively correlated with  $\omega$ ,  $\omega_a$  and  $\omega_{na}$  (Supplement Information, section *Molecular*  
93 *interactions contribute to the variations of protein sequence evolution and adaptation*, Table S1, Figure  
94 S1). The results indicate that molecular interactions might act as an important factor that drive protein  
95 adaptive evolution in *Drosophila* genome.

96 We then investigate whether residues involved in molecular interactions are targets for adaptive  
97 evolution. To tackle this question, we predicted protein-protein interaction sites (PPI-sites) and DNA  
98 binding sites (DNA-sites) for each of *D. melanogaster* protein sequence (see Methods). In addition, we  
99 characterized allosteric residues as surface and interior critical residues with STRESS model (Clarke et  
100 al., 2016) for all the structural models. We also extracted putative binding sites from STRESS Monte  
101 Carlo (MC) simulations. We calculated  $\omega$ ,  $\omega_a$  and  $\omega_{na}$  for residues in each of the putative molecular

102 interaction category. Strikingly, we observed that residues involved in protein-protein interactions, DNA  
103 binding and ligand binding exhibited higher rates of adaptive evolution compared to their corresponding  
104 null sites (Fig. 1A-C). In addition, allosteric residues at protein surface showed higher adaptation rates  
105 than allosteric residues at protein interior or residues that are not involved in ligand binding (Fig. 1C).

106 Since we observed significant positive intercorrelations between PPI and DNA binding with ISD  
107 (intrinsic structural disorder) and RSA (relative solvent accessibility) (Table S2), we next asked whether  
108 the increase of  $\omega_a$  in protein-protein interactions sites or DNA binding sites was caused by the increase of  
109 disorder or site exposure. We calculated and compared  $\omega$ ,  $\omega_a$  and  $\omega_{na}$  for putative PPI and DNA binding  
110 sites with different levels of ISD or RSA. Remarkably, we found that  $\omega_a$  of these binding sites remains  
111 similar among different levels of ISD or RSA (Fig. S5AC). The results suggest that PPI or DNA binding  
112 events in proteins can result in elevated adaptation rates regardless their structural disorder or site  
113 exposure. While for residues that are not associated with putative PPI or DNA binding, we also observed  
114 increase in  $\omega_a$  when increasing ISD or RSA (Fig. S5BD), which could be the result of some other yet  
115 unknown underlying mechanisms. In addition, there is possibility that binding sites in disordered regions  
116 are not well-predicted. However, given that ISD does not show strong impact to binding sites (Fig.  
117 S5AC), we think the inaccuracy of binding sites may not play a significant role.

118 In order to gain better understanding of adaptation in molecular interaction sites, we further  
119 visualized positive selections that are associated with molecular interactions. We first investigated  
120 whether adaptive evolution is associated with particular protein structures or protein families. To do this,  
121 we looked into fast-adaptive proteins with the largest ~15% rates of adaptation ( $\omega_a > 0.15$ ) that are linked  
122 to high quality structural models. Interestingly, among these proteins, we found 45 enriched as trypsin-  
123 like cysteine/serine peptidase domain and 17 7TM chemoreceptors, suggesting widespread adaptive  
124 evolution acting on these protein families or protein domains in *D. melanogaster* (Table S3). Many of the  
125 7TM chemoreceptors are olfactory and gustatory genes and show adaptive evolution in various species  
126 such as *Drosophila* and mosquito (Hill et al., 2002; Lawniczak and Begun, 2007; McBride, 2007; Wu et  
127 al., 2009). In addition to these two protein families, previous studies identified recurrent positive  
128 selections acting on some other fast-adaptive proteins in *Drosophila* and mammals, and the possible  
129 adaptive evolution mechanisms have been linked to exogenous ligand binding, for example, serine  
130 protease inhibitors (serpin), Toll-like receptor 4 (TLR-4), and cytochrome P450 (Jiggins and Kim, 2007;  
131 Slodkowitz and Goldman, 2020).

132 In order to visualize the link between adaptive evolution and molecular interactions in the two  
133 protein families with frequent adaptive evolution, we showed significant positive selections and  
134 molecular interactions in two representatives: CG10232 and Or67a, each for trypsin-like cysteine/serine  
135 peptidase domain and 7TM chemoreceptors, respectively. We observed that in both cases, positively

136 selected sites highly overlapped with predicted or inferred binding pockets (Fig. 1D-E). Specifically, in  
137 CG10232, we found clusters of positive selected sites around NAG binding sites that are inferred from a  
138 crystal structure of serine protease (PDB code: 2XXL) (Fig. 1D), while in Or67a, positively selected sites  
139 expand around the putative odorant binding channel formed by helices S1-S6 in extracellular regions  
140 (Butterwick et al., 2018) (Fig. 1E).

141         Except for these examples that are associated with exogenous ligand or exogenous peptide  
142 binding, we also identified two previously not described examples where adaptive evolution might be  
143 linked to endogenous protein binding: Spaztle (spz, Fig. 1F) and Cul6 (Fig. 1G). Spaztle can bind to Toll-  
144 like receptors (TLR) and trigger humoral innate immune response. We built the missing loop in Spaztle in  
145 the crystal structure of Toll/Spaztle complex (PDB code 4BV4) according to the dimeric crystal structure  
146 of Spaztle (PDB code 3E07). In this complex structural model, we observed several positively selected  
147 sites in Toll-4/Spaztle interfaces (Fig. 1F). Cul6, another example, is a protein in cullins family in *D.*  
148 *melanogaster*. The cullins protein family are known as scaffold proteins that assemble multi-subunit  
149 Cullin-RING E3 ubiquitin ligase by forming SCF complex with F box and RING-box (Rbx) proteins  
150 (Zheng et al., 2002). We constructed the putative Cul6 contained SCF complex by superimposition to the  
151 crystal structure of the Cul1-Rbx1-Skp1-F box<sup>Skp2</sup> SCF ubiquitin ligase complex (Zheng et al., 2002). In  
152 the structural model, we observed positive selected sites in Cul6 clustered around the binding sites of  
153 RING-box protein, Rbx1, and F-box protein, Skp1 (Fig. 1G).

154

### 155 **Frequent adaptive evolution and co-adaptive evolution in genes involved in reproduction,** 156 **immune system, and environmental information processing**

157 To find out whether specific biological functions were associated with fast-adaptive genes, we applied  
158 DAVID Go analysis with genes that have largest ~15% rates of adaptation ( $\omega_a > 0.15$ ). The significant Go  
159 terms are frequently linked to serine-type endopeptidase activity, reproduction, protein lysis,  
160 chemosensory and other related biological functions (Table S4). As these fast-adaptive genes tend to be  
161 enriched in similar biological functions, we asked whether these genes are evolved co-adaptively, i.e.,  
162 whether these proteins are interacting with each other frequently. To test this possibility, we obtained PPI  
163 of *D. melanogaster* from STRING database (Szklarczyk et al., 2019) and analyzed protein-protein  
164 interactions among fast-adaptive proteins. We found that fast-adaptive proteins tend to interact with each  
165 other more frequently than expected (PPI enrichment p-value  $< 1.0e-16$ ). In the PPI network of fast-  
166 adaptive proteins, we observed 7 strongly connected sub-clusters with at least 5 members (Fig. 2A, Table  
167 S5). Proteins in these sub-clusters are enriched in biological processes such as reproduction, immune  
168 response, defense response to bacterium and virus, RNA interference, chitin metabolic, etc., which are in  
169 line with the Go analysis of fast-adaptive genes (Table S6-S11).

170 We next asked whether co-adaptation plays a role in the adaptive evolution of interacting proteins  
171 to a broader extend, including both fast- and slow-adaptive proteins. To address this question, we  
172 analyzed and compared adaptation rates of all *D. melanogaster* PPIs available in STRING database with  
173 high confidence and we found that protein partners of fast-adaptive proteins ( $\omega_a > 0.15$ ) have significantly  
174 larger maximum/average  $\omega_a$  compared to slow-adaptive proteins (Figure 3). We further analyzed and  
175 visualized adaptive evolutionary rates of proteins in PPI networks of 9 different biological pathways  
176 extracted from KEGG pathways, including immune system, xenobiotics biodegradation, response to  
177 environment, aging and development, genetic information processing, sensory system, transport and  
178 catabolism, cell growth and death and metabolism. We observed that, in these PPI networks, proteins with  
179 relatively large  $\omega_a$  tend to interact with each other (Figure 4AB). We also noticed that, for pathways that  
180 are previously known as adaptation-hotspots, e.g., immune system, fast-adaptive proteins can act as  
181 central nodes and are co-adaptively evolved with other fast-adaptive proteins (Figure 4AC). While in  
182 pathways such as transport and catabolism, fast-adaptive proteins are mainly at PPI periphery. In line with  
183 these findings, we found that  $\omega_a$  are larger in pathways that harbor fast-adaptive proteins as central nodes  
184 than other pathways (Figure S6).

185 ***Physical interactions contribute to co-adaptation of fast-adaptive genes.*** Having established that  
186 molecular interactions contribute to adaptive evolution of protein sequence, we then investigated whether  
187 these physical molecular interactions could drive protein-protein co-adaptation. To do this, we looked into  
188 interacting fast-adaptive protein pairs that are associated known or inferred complex structural models.  
189 For inferred complex structural models, we superimposed the structural models of the pair of proteins  
190 onto their high resolution homologous complex structures. Here we observed and illustrated co-adaptation  
191 at PPI interface in two examples: Toll-4/Spatzle and Spn28Db/CG18563 (Fig. 2BC).

192 ***Toll-4/Spatzle.*** Toll-4 is a member of toll-like receptors. Previous studies have shown strong evidence of  
193 adaptive evolution of Toll-4 in *Drosophila* and mammals (Levin and Malik, 2017; Slodkiewicz and  
194 Goldman, 2020). Toll-4 can bind to Spatzle and trigger further innate immune responses with high  
195 confidence (inferred from STRING database). In the previous section, we showed that several positively  
196 selected sites in Spatzle overlap with Toll-Spatzle interfaces (Fig. 1F). Here, we further showed that, in  
197 Toll-4, considerable number of significant positively selected sites were located at interface for Spatzle  
198 (Fig. 2B), which is in line with a previous study of Toll-4 in *D. willistoni* (Levin and Malik, 2017).

199 ***Spn28Db/CG18563.*** Spn28Db is one of the serine protease inhibitors in *D. melanogaster* that are  
200 expressed in male accessory glands, while CG18563 belongs to the protein family of trypsin-like  
201 cysteine/serine peptidase domain. The interactions between the two proteins were predicted with high  
202 confidence from STRING database, and the molecular interactions can be inferred from existing crystal  
203 structure of serpin and bacteria protease complex (PDB code 1EZK). We observed many positive

204 selected sites at the molecular interface between the two proteins (Fig. 2C), suggesting that physical  
205 interactions might play a role in the co-adaptation of the two proteins.

206

### 207 **Most clinally differentiated non-synonymous SNPs in protein-coding genes are adaptive**

208 To find out the relations between short-term adaptation to local environments and long-term adaptive  
209 evolution, we extracted residues with significant  $F_{ST}$  SNPs from clinal variations (Svetec et al., 2016). We  
210 then computed evolutionary rates ( $\omega$ ), adaptation rates ( $\omega_a$ ) and non-adaptation rates ( $\omega_{na}$ ) of these  
211 residues as in previous section. We observed that these residues have much higher ratio of adaptation  
212 rates over non-adaptation rates than genome-wide random expectations (Fig. 5A), suggesting that these  
213 residues have higher proportions of adaptive changes, and that they can be hotspots for adaptive  
214 evolution. To find out whether these SNPs are related with even longer-term adaptive evolution, we  
215 inferred positive selection sites of each protein-coding gene from phylogenic data (see Methods). We  
216 found that the non-synonymous  $F_{ST}$  SNPs are significantly enriched in long-term positive selections  
217 (Table S12- S13). To further characterize structural and functional properties of short-term genetic  
218 variations, we mapped significant nonsynonymous  $F_{ST}$  residues to different structural and functional  
219 characteristics, such as ISD, RSA, PPI-sites, DNA-sites and ligand-binding sites. We found that these  
220 non-synonymous SNPs were enriched in disordered regions and protein surfaces and were significantly  
221 more likely to be involved in protein-protein interactions and ligand-binding than expectation (Table S14-  
222 S18). To better visualize the characteristics of these SNPs, we used Toll-4 as an example. We mapped  
223 significant non-synonymous  $F_{ST}$  SNPs in Toll-4 on to its structural model. We showed that  $F_{ST}$  SNPs are  
224 either positively selected or being very close to positively selected sites (Fig. 5BC). For example, highly  
225 differentiated sites, N279 (FDR  $3e-7$ ) and H431 (FDR  $3e-6$ ) were predicted to be positively selected both  
226 at probability at  $p=0.9$ . While another highly differentiated site, D424 was close to three positively  
227 selected sites S401 ( $p=0.8$ ), H431 ( $p=0.95$ ) and V448 ( $p=0.8$ ). We also noticed some differentiated sites  
228 that may be located within ligand binding sites, including F297 (FDR  $3e-3$ ), S311 (FDR  $3e-3$ ), H431  
229 (FDR  $3e-6$ ) and H462 (FDR  $1e-2$ ).

230

### 231 **Discussion**

232 In this study, we systematically studied the impact of structure- and function-related gene properties on  
233 protein sequence evolution and adaptation in *D. melanogaster* genome. We found that molecular  
234 interactions in proteins contribute to the variation of protein sequence adaptive evolution. A novel  
235 discovery of this work is that molecular interaction sites including protein-protein interaction sites and  
236 protein-DNA interaction sites are hotspots for adaptative evolution. We revealed that fast-adaptive  
237 proteins tend to interact with each other frequently and protein partners of these fast-adaptive proteins

238 tend to have higher adaptation rates, suggesting that co-adaptive evolution might be common in *D.*  
239 *melanogaster*. By looking at interacting fast-adaptive proteins, we further demonstrated that physical  
240 interactions may contribute to the mechanisms of co-adaptive evolution of fast-adaptive proteins.

241 Although our results are in agreement with previous studies on the factors driving protein  
242 sequence evolution (Zhang and Yang, 2015), we showed some complex correlations between  $\omega$ ,  $\omega_a$  and  
243  $\omega_{na}$  and protein length and male specificity (Supplement information, section *Complex correlations of*  
244 *protein length and male expression level with protein evolutionary rates*, Fig. S2-S4, supplement file S2).  
245 These complex correlations suggest caveat exists when we looked at protein length and gene expression  
246 levels. For example, gene expression level was proved to be a major determinant (Zhang and Yang, 2015)  
247 through mechanisms such as the pressure for translational robustness, i.e., robustness to translational  
248 missense errors (Drummond et al., 2005). Previous studies have revealed that male biased or female  
249 biased genes can be fast evolving (Yang et al., 2016). While on the other hand, many male biased genes  
250 can be highly expressed in testis, which results in a complex correlation between protein sequence  
251 evolutionary rate and male expression level or even mean expression level of *D. melanogaster*. The  
252 unique evolutionary property of these male biased or specific genes could be caused by the unique  
253 transcriptional scanning mechanism in testis (Xia et al., 2020). We propose that tissue specificity might be  
254 a better quantity when considering the impact of gene expression profile on protein sequence evolution in  
255 *D. melanogaster*. In addition to male expression level, a similar complex correlation was observed for  
256 protein length. It has been the notion that short proteins tend to evolve faster than long proteins, which  
257 may be biologically relevant or byproduct of other factors such as selection on buried and exposed sites  
258 (Moutinho et al., 2019). Here, we demonstrated that, in *D. melanogaster*, although protein length is  
259 strongly negatively correlated with protein sequence evolutionary rate, genes that have the slowest  
260 evolutionary rates tend to be relatively short. This could be caused by the fact that under essential  
261 functional constraint, genes can undergo strong purifying selections, while essential genes such as  
262 secreted proteins are constrained to be smaller, and that essential genes could be shorter than other genes  
263 (Chen et al., 2020).

264 Protein surface and intrinsic disorder regions are frequent targets for adaptive evolution and  
265 contribute to the variations of protein sequence adaptive evolution (Afanasyeva et al., 2018; Moutinho et  
266 al., 2019), however, the detailed mechanisms underlying these observations remains unclear. One  
267 possible explanation would be that these regions are frequently linked to intermolecular interactions  
268 (Afanasyeva et al., 2018; Moutinho et al., 2019). For example, Moutinho et al hypothesized that  
269 molecular interactions involved in host-pathogen coevolution were the major driver of protein adaptation  
270 (Moutinho et al., 2019). Here, we further identified that proportions of possible molecular interaction sites  
271 inside proteins contribute to the variations of protein sequence adaptive evolution and that these



272 molecular interaction sites or regulatory sites at protein surface can be hotspots of protein adaptation.  
273 Indeed, some specific molecular interactions have been linked to adaptive evolution in several case  
274 studies (Bachtrog, 2008; Hughes and Nei, 1988; Levin and Malik, 2017; Schott et al., 2014) and large-  
275 scale studies based on proteins with high quality structural models (Slodkowicz and Goldman, 2020). In  
276 the latter study, the authors showed that positive selections in mammals tend to cluster closer to binding  
277 sites of exogenous ligands than expected by chance (Slodkowicz and Goldman, 2020), suggesting an  
278 important role of function important regions in adaptive evolution. Here, we extend the conclusion to *D.*  
279 *melanogaster* genome, including proteins with or without high resolution structural models. We also  
280 showed that except for exogenous ligands, endogenous ligands might also contribution to adaptive  
281 evolution, while the latter might explain why interacting proteins tend to evolve co-adaptively.

282 Notably, previous studies have revealed that multi-interface proteins tend to be evolving more  
283 slowly than single-interface proteins (Kim et al., 2006), which seems to be contradictory to our results  
284 that proteins with more interaction sites evolve faster and have faster adaptation rates. Here, we argue  
285 that, in our study, we used sequence profile to predict molecular interaction sites in proteins at a genomic  
286 scale, rather than only looking into proteins with high resolution structures. In this way, we may capture  
287 many weak or transient interactions, which are thought to be evolving faster than obligate and conserved  
288 interactions (Mintseris and Weng, 2005). Meanwhile, we did not exclude intrinsic disordered regions  
289 (IDR) or intrinsic disordered proteins (IDP) in our study, which are widespread in *D. melanogaster*  
290 genome. It has been suggested that IDR/IDP tend to evolve fast due to lack of structural restraints  
291 (Echave et al., 2016). In the functional aspect, IDR/IDP are thought to be promiscuous binders through  
292 many multiple binding mechanisms, including forming static, semi-static, and fuzzy or dynamic  
293 complexes (Uversky, 2019), suggesting that the evolution of IDR/IDP cannot be explained merely by the  
294 lack of structural restraints. Actually, IDP and IDR in human genome were found to be undergoing  
295 extensive adaptive evolution (Afanasyeva et al., 2018). At last, it has been recognized that, except for  
296 allosteric regulations, encounter complexes (Gabdoulline and Wade, 1999) might also play an important  
297 role in mediating intermolecular interactions, such as protein-protein association (Tang et al., 2006) and  
298 protein-ligand binding (Re et al., 2019). Since encounter residues that are responsible for encounter  
299 complexes do not reside in conserved binding interfaces, these residues could be under relaxed purifying  
300 selections or even positive selections, which could be another yet-to-identify mechanism that contribute to  
301 protein sequence adaptive evolution.

302 We showed that fast-adaptive proteins are enriched in molecular functions such as reproduction,  
303 immunity and environmental information processing (Begun and Lindfors, 2005; Begun and Whitley,  
304 2000; Lazzaro et al., 2004). We further demonstrated that fast-adaptive proteins tend to interact with each  
305 other more frequently than random expectations, suggesting co-adaptation might be common among fast-

306 adaptive proteins. Mechanisms that contribute to the co-adaptation could be: (1) interacting fast-adaptive  
307 proteins are often enriched in similar molecular functions and under similar selective pressure; (2)  
308 interacting fast-adaptive undergo co-evolution through physical interactions. In this study we showed two  
309 examples that adaptive evolution could occur at protein-protein interface, which suggest that physical  
310 interactions could contribute to the co-adaptation of fast-adaptive proteins in *D. melanogaster*. Moreover,  
311 we showed that co-adaptation might exist to a broader extend rather than only among fast-adaptive  
312 proteins. Specifically, proteins that interact with fast-adaptive proteins tend to have higher adaptation  
313 rates. Since molecular interactions contribute to adaptive evolution, it is reasonable to hypothesize that  
314 co-adaptation at this broader extend could be regulated by these interactions. Actually, it has been  
315 suggested that interacting proteins tend to have similar evolutionary rates and the possible mechanism  
316 would be the co-evolution of physical interactions (Pazos and Valencia, 2008).

317 In this study, we found that loci with significant genetic variance among populations harbor  
318 higher proportions of long-term adaptive changes and these loci follow similar patterns as adaptive  
319 changes, i.e. they are enriched in disordered regions, protein surfaces, and functionally important regions.  
320 These results suggest that population differentiation of protein-coding genes can be an important basis for  
321 long-term adaptive evolution. In other word, many SNPs are repeatedly selected for adaptive process in  
322 evolution. Importantly, our results indicate that most of the clinal amino-acid changes are adaptive,  
323 suggesting that non-selective forces play a non-essential role in the SNPs that show strong geographic  
324 differences. Our results also support a large effect of spatially varying selection on protein sequence and  
325 structures (Storz and Kelly, 2008).

326 It should be noted that studies at the genomic scale that aim to uncover the function- or structure-  
327 related constraints imposed on protein sequence evolution and adaptation share similar limitations that for  
328 most of the proteins or residues, structural or functional information would be incomplete or even  
329 missing. To overcome this, in this study, we used highly accurate neural-network based tools to predict  
330 molecular interactions, secondary structures, intrinsic structural disorder, relative solvent accessibility for  
331 each of the protein. In this way we were able to identify key factors that impact protein sequence  
332 evolution and adaptation in a less accurate but rather systematic fashion. We hope that with the  
333 availability of more and more curated structural, functional information and complex structural models of  
334 proteins in the near future, we will be able to uncover the precise role of molecular interactions in protein  
335 sequence adaptive evolution.

336

## 337 **Material and Methods**

338  **$d_N/d_S$  ratio ( $\omega$ ).** We used a maximum likelihood method to infer  $d_N/d_S$  ratio ( $\omega$ ) of *D. melanogaster*  
339 protein-coding genes using the genome sequences of five species in *melanogaster* subgroup (*D.*

340 *melanogaster*, *D. simulans*, *D. sechellia*, *D. yakuba*, and *D. erecta*). The protein-coding sequences were  
341 extracted from the alignments of 26 insects, which were obtained from UCSC Genome Browser  
342 (<http://hgdownload.soe.ucsc.edu/downloads.html>). The sequences were further processed by GeneWise  
343 (Birney et al., 2004) to remove possible insertions and deletions using the longest isoforms of the  
344 corresponding *D. melanogaster* protein sequences as references (FlyBase version r6.15) (Thurmond et al.,  
345 2019). The processed sequences were then realigned by PRANK -codon function (Löytynoja, 2014). We  
346 used codeml in PAML (Yang, 2007) to compute gene-specific  $\omega$  using M0 model. We removed  
347 sequences that have more than 15% of their nucleotides not aligned (gaps) to *D. melanogaster* genes in  
348 more than 2 species. To further avoid numeric errors and ensure reasonable estimations, we only retained  
349 relatively divergent sequences that are: (1) divergent with dS larger than 0.3, (2) less divergent with dS  
350 larger than 0.1 and dN smaller than 0.001 ( $dS \gg dN$ ). At last, there were 12118 genes in total passed all  
351 the criteria and were assigned gene specific  $\omega$ , containing 6,538,872 amino acids. We also calculated site-  
352 specific  $\omega$  by using likelihood ratio tests (LRT) comparing M7 model against M8 model (Yang et al.,  
353 2005).

354 **Rate of adaptive and nonadaptive changes.** We recalled all SNPs of 205 inbred lines from  
355 the Drosophila Genetic Reference Panel (DGRP), Freeze 2.0 (Huang et al., 2014)  
356 (<http://dgrp2.gnets.ncsu.edu>). We then generated 410 alternative genomes using all monoallelic and bi-  
357 allelic SNP data sets. We extracted the coding sequences of *D. melanogaster* genes from the generated  
358 alternative genomes, removed all possible insertions and deletions using GeneWise (Birney et al., 2004)  
359 as described above. We then align all the coding sequences to their corresponding aligned CDS sequences  
360 using PRANK -codon function (Löytynoja, 2014). We removed polymorphisms segregating at  
361 frequencies smaller than 5% to reduce possible slightly deleterious mutations (Charlesworth and Eyre-  
362 Walker, 2008). In order to avoid possible effects of low divergence between *D. simulans* and *D.*  
363 *melanogaster* (Keightley and Eyre-Walker, 2012), we used *D. yakuba* as outgroup to estimate  
364 nonsynonymous polymorphisms (Pn), synonymous polymorphisms (Ps), nonsynonymous substitutions  
365 (Dn) and synonymous substitutions (Ds) by MK.pl (Begun et al., 2007; Langley et al., 2012). Similar as  
366 Begun et al. (Begun et al., 2007), we only analyzed genes with at least six variants for each of  
367 substitutions, polymorphisms, nonsynonymous changes and synonymous changes. We used an extension  
368 of MK test, asymptotic MK (Messer and Petrov, 2013; Uricchio et al., 2019), to estimate the proportions  
369 of adaptive changes ( $\alpha$ ). The rate of adaptive changes ( $\omega_a$ ) was then calculated as  $\omega_a = \omega\alpha$  and the rate of  
370 non-adaptive changes as  $\omega_{na} = \omega - \omega_a$ . Details of the asymptotic MK test were as following:  
371 (1) Classical McDonald–Kreitman test. According to Smith and Eyre-Walker (Smith and Eyre-Walker,  
372 2002), the proportions of adaptive changes for protein-coding genes can be calculated as following:

373 
$$\alpha = 1 - \frac{DsPn}{DnPs}$$

374 According to this equation, we could estimate the proportion of adaptive changes and carried out classical  
375 MK test by applying Fisher's exact test.

376 (2) Asymptotic estimation of  $\alpha$ . A known problem of the classical estimation of  $\alpha$  above is the  
377 accumulation of slightly deleterious mutations at low frequencies. We therefore used an extension of MK  
378 test, asymptotic MK test approach (Messer and Petrov, 2013) to estimate the proportions of adaptive  
379 changes. As in original aMK, we defined  $\alpha(x)$  as a function of derived allele frequency ( $x$ ):

380 
$$\alpha(x) = 1 - \frac{DsPn(x)}{DnPs(x)}$$

381 where  $Pn(x)$  and  $Ps(x)$  are number of non-synonymous and synonymous polymorphisms at frequency  $x$ ,  
382 respectively. However, the original approach may suffer from numeric errors when there were very few  
383 polymorphic sites, which is quite common in many of *D. melanogaster* genes. To make the estimations  
384 more robust while preserving the same asymptote, we further define  $Pn(x)$  and  $Ps(x)$  as total number of  
385  $Pn$  and  $Ps$  above frequency  $x$  as described in Uricchio et al (Uricchio et al., 2019). We fitted  $\alpha(x)$  to an  
386 exponential curve of  $\alpha(x) \approx \exp(-bx)+c$  using `lmfit` (Newville and Stensitzki, 2018) and determined the  
387 asymptotic value of  $\alpha$  at the limit of  $x$ , 1.0. We then estimate the rate of adaptive changes ( $\omega_a$ ) as

388 
$$\omega_a = \frac{N_a/L_N}{dS} = \frac{dN_a}{dS} = \frac{dN_a}{dN} \cdot \frac{dN}{dS} = \alpha\omega$$

389 where  $N_a$  is the number of adaptive changes and  $dN_a=N_a/L_N$  is the number of adaptive changes per  
390 nonsynonymous site. Finally, we calculated the rate of nonadaptive changes ( $\omega_{na}$ ) as  $\omega_{na}=\omega-\omega_a$ . The final  
391 dataset contains 7192 protein-coding genes, with smallest  $\omega_a$  being 0.00 and largest being 1.29.

392 ***Structure-/function- related properties of D. melanogaster proteins.*** We obtained function-related  
393 properties mentioned in main text as following. We derived *D. melanogaster* gene ages (Kondo et al.,  
394 2017; Zhang et al., 2010) for genes that are specific to *Drosophila*, and from GenTree (Shao et al., 2019)  
395 for genes that are beyond *Drosophila* clade. We then assigned a pseudo-age to each of the genes.  
396 Specifically, there are 11 age groups from "cellular organisms", assigning to a pseudo age value of 0, to  
397 "melanogaster", assigning a pseudo age value of 10. We downloaded *D. melanogaster* protein-protein  
398 interaction (PPI) from STRING database (Szklarczyk et al., 2019). A cut-off of combined score larger  
399 than 0.7 was used to retain high confident PPI for further analysis. We then used BSpred (Mukherjee and  
400 Zhang, 2011) to predict protein-protein interaction (PPI) sites and DRNApred (Yan and Kurgan, 2017) to  
401 predict DNA binding sites. For each protein, we calculated ratios of protein interaction residues (PPI-site  
402 ratio) and ratios of DNA binding residues (DNA-site ratio) by dividing total predicted protein interaction  
403 sites and DNA binding sites over protein length, respectively. For structure-related properties, we used

404 DeepCNF (Wang et al., 2016) to predict these properties for each gene, including three-state secondary  
405 structures (helix, sheet, and coil), structural disorder, relative solvent accessibility (RSA). Further, we  
406 calculated the ratios of helix, sheet, helix+sheet, and coil residues of each gene from predicted secondary  
407 structures. For each gene, we computed intrinsic structural disorder (ISD) and relative solvent  
408 accessibility (RSA), as protein-length normalized summations of the probabilities of each residue being  
409 disorder and exposed, respectively.

410 **Gene expression patterns.** We downloaded gene expression profile from FlyAtlas2 (Leader et al., 2018).  
411 We converted FPKM to TPM by normalizing FPKM against the summation of all FPKMs as following:

$$412 \quad \text{TPM}_i = \frac{\text{FPKM}_i}{\sum \text{FPKM}_j} \times 10^6$$

413 After TPM conversion, we only retained genes with expression level larger than 0.1 TPM for further  
414 analysis. We treated male and female whole-body TPM as male and female expression levels. We  
415 calculated mean expression level by averaging male and female TPM. We used following Z-score to  
416 describe male specificities of *D. melanogaster* genes:

$$417 \quad zscore = \frac{\text{TPM}(\text{male expression}) - \text{TPM}(\text{female expression})}{\sqrt{sd^2(\text{male expression}) + sd^2(\text{female expression})}}$$

418 We calculated tissue specificities of genes using tau values (Yanai et al., 2005) based on the expression  
419 profiles of 27 different tissues.

420 **High quality 3D structures of *D. melanogaster* proteins.** We downloaded high-quality structures or  
421 structural models of *D. melanogaster* proteins from protein data bank (PDB) (Burley et al., 2019),  
422 SWISS-MODEL Repository (Bienert et al., 2017), and MODBASE (Pieper et al., 2011), with descending  
423 priorities. For example, if there were 3D structures of a same protein or protein region in multiple  
424 databases, we first considered high-resolution structures from PDB; if no structures were found in PDB,  
425 we then considered SWISS-MODEL Repository; and at last from MODBASE. In addition, we used  
426 blastp (Camacho et al., 2009) to search homologs of each *D. melanogaster* protein against all PDB  
427 sequences with E-value threshold of 0.001. We further carried out comparative structural modeling using  
428 RosettaCM (Song et al., 2013) to model high-quality structural models of proteins or protein regions that  
429 were not available in PDB, SWISS-MODEL Repository and MODBASE. For each RosettaCM  
430 simulation, we used no more than 5 most significant hits from blastp search. For proteins that are in  
431 complex forms, we only extracted monomers for further analysis. At last, we obtained 14543 high quality  
432 structural models, corresponding to 11284 genes. These structural models contain 2,691,913 unique  
433 amino acids, 41.2% of all the residues in genes that were assigned  $\omega$ .

434 ***Evolutionary rates of different structural/functional sites.*** We classified amino acids into different  
435 classes of structural/functional properties. Specifically, we classified three classes for both ISD and RSA  
436 according the probability of residues being disordered or exposed: ordered or buried (0.00 to 0.33),  
437 medium (0.33 to 0.67), disordered or exposed (0.67 to 1.00). For both PPI and DNA binding, we  
438 classified two classes: PPI-site or DNA-site (binding sites), None-PPI or None-DNA (corresponding null  
439 sites for PPI or DNA binding). For residues that have 3D structures, we used STRESS (Clarke et al.,  
440 2016) to predict putative ligand binding sites and allosteric sites from all the high-quality structures or  
441 structural models. The allosteric sites were further classified as surface critical or interior critical  
442 according to their locations. We then classified these residues into four groups: LIG (ligand binding sites),  
443 Surf. Crit. (surface critical sites), Interior Crit. (interior critical sites) and Others (other sites). For each of  
444 the site classes, we randomly sampled 100 sequences, each containing 10,000 amino acids. We computed  
445  $\omega$ ,  $\omega_a$ , and  $\omega_{na}$  for the randomly sampled sequences similar as the steps described in the above sections.

446

#### 447 **Acknowledgements**

448 We thank members of the Zhao Lab for helpful discussions.

449

#### 450 **Author contribution**

451 J.P. and L.Z. conceived the study. J.P. performed the analysis with the input from L.Z.. J.P. and L.Z.

452 wrote the manuscript.

453

#### 454 **Funding**

455 The work was supported by NIH MIRA R35GM133780, the Robertson Foundation, a Monique Weill-  
456 Caulier Career Scientist Award, an Alfred P. Sloan Research Fellowship (FG-2018-10627), a Rita Allen  
457 Foundation Scholar Program, and a Vallee Scholar Program (VS-2020-35) to L. Z.. J.P. is supported by a  
458 C. H. Li Memorial Scholar Fund Award at The Rockefeller University.

459

#### 460 **Declaration of interests**

461 The authors declare no competing interests.

462

#### 463 **Reference**

464 Afanasyeva, A., Bockwoldt, M., Cooney, C.R., Heiland, I., and Gossmann, T.I. (2018). Human long  
465 intrinsically disordered protein regions are frequent targets of positive selection. *Genome Res.* 28, 975–  
466 982.

467 Bachtrog, D. (2008). Positive selection at the binding sites of the male-specific lethal complex involved in

- 468 dosage compensation in *Drosophila*. *Genetics* *180*, 1123–1129.
- 469 Begun, D.J., and Lindfors, H.A. (2005). Rapid evolution of genomic Acp complement in the  
470 melanogaster subgroup of *Drosophila*. *Mol. Biol. Evol.* *22*, 2010–2021.
- 471 Begun, D.J., and Whitley, P. (2000). Adaptive evolution of relish, a *Drosophila* NF-kappaB/IkappaB  
472 protein. *Genetics* *154*, 1231–1238.
- 473 Begun, D.J., Holloway, A.K., Stevens, K., Hillier, L.D.W., Poh, Y.P., Hahn, M.W., Nista, P.M., Jones,  
474 C.D., Kern, A.D., Dewey, C.N., et al. (2007). Population genomics: Whole-genome analysis of  
475 polymorphism and divergence in *Drosophila simulans*. *PLoS Biol.* *5*, 2534–2559.
- 476 Bienert, S., Waterhouse, A., De Beer, T.A.P., Tauriello, G., Studer, G., Bordoli, L., and Schwede, T.  
477 (2017). The SWISS-MODEL Repository-new features and functionality. *Nucleic Acids Res.* *45*, D313–  
478 D319.
- 479 Birney, E., Clamp, M., and Durbin, R. (2004). GeneWise and Genomewise. *Genome Res.* *14*, 988–995.
- 480 Burley, S.K., Berman, H.M., Bhikadiya, C., Bi, C., Chen, L., Di Costanzo, L., Christie, C., Dalenberg, K.,  
481 Duarte, J.M., Dutta, S., et al. (2019). RCSB Protein Data Bank: Biological macromolecular structures  
482 enabling research and education in fundamental biology, biomedicine, biotechnology and energy. *Nucleic*  
483 *Acids Res.* *47*, D464–D474.
- 484 Butterwick, J.A., del Marmol, J., Kim, K.H., Kahlson, M.A., Rogow, J.A., Walz, T., and Ruta, V. (2018).  
485 Cryo-EM structure of the insect olfactory receptor Orco. *Nature* *560*, 447–452.
- 486 Camacho, C., Coulouris, G., Avagyan, V., Ma, N., Papadopoulos, J., Bealer, K., and Madden, T.L.  
487 (2009). BLAST+: Architecture and applications. *BMC Bioinformatics* *10*, 421.
- 488 Charlesworth, J., and Eyre-Walker, A. (2008). The McDonald-Kreitman test and slightly deleterious  
489 mutations. *Mol. Biol. Evol.* *25*, 1007–1015.
- 490 Chen, H., Zhang, Z., Jiang, S., Li, R., Li, W., Zhao, C., Hong, H., Huang, X., Li, H., and Bo, X. (2020).  
491 New insights on human essential genes based on integrated analysis and the construction of the HEGIAP  
492 web-based platform. *Brief. Bioinform.* *21*, 1397–1410.
- 493 Clarke, D., Sethi, A., Li, S., Kumar, S., Chang, R.W.F., Chen, J., and Gerstein, M. (2016). Identifying  
494 Allosteric Hotspots with Dynamics: Application to Inter- and Intra-species Conservation. *Structure* *24*,  
495 826–837.
- 496 Drummond, D.A., Bloom, J.D., Adami, C., Wilke, C.O., and Arnold, F.H. (2005). Why highly expressed  
497 proteins evolve slowly. *Proc. Natl. Acad. Sci. U. S. A.* *102*, 14338–14343.
- 498 Echave, J., Spielman, S.J., and Wilke, C.O. (2016). Causes of evolutionary rate variation among protein  
499 sites. *Nat. Rev. Genet.* *17*, 109–121.
- 500 Enard, D., Cai, L., Gwennap, C., and Petrov, D.A. (2016). Viruses are a dominant driver of protein  
501 adaptation in mammals. *Elife* *5*, e12469.

- 502 Gabdoulline, R.R., and Wade, R.C. (1999). On the protein-protein diffusional encounter complex. *J. Mol.*  
503 *Recognit.* *12*, 226–234.
- 504 Goldman, N., Thorne, J.L., and Jones, D.T. (1998). Assessing the impact of secondary structure and  
505 solvent accessibility on protein evolution. *Genetics* *149*, 445–458.
- 506 Hill, C.A., Fox, A.N., Pitts, R.J., Kent, L.B., Tan, P.L., Chrystal, M.A., Cravchik, A., Collins, F.H.,  
507 Robertson, H.M., and Zwiebel, L.J. (2002). G Protein-Coupled Receptors in *Anopheles gambiae*. *Science*  
508 *298*, 176–178.
- 509 Huang, W., Massouras, A., Inoue, Y., Peiffer, J., Ràmia, M., Tarone, A.M., Turlapati, L., Zichner, T.,  
510 Zhu, D., Lyman, R.F., et al. (2014). Natural variation in genome architecture among 205 *Drosophila*  
511 *melanogaster* Genetic Reference Panel lines. *Genome Res.* *24*, 1193–1208.
- 512 Hughes, A.L., and Nei, M. (1988). Pattern of nucleotide substitution at major histocompatibility complex  
513 class I loci reveals overdominant selection. *Nature* *335*, 167–170.
- 514 Jiggins, F.M., and Kim, K.W. (2007). A screen for immunity genes evolving under positive selection in  
515 *Drosophila*. *J. Evol. Biol.* *20*, 965–970.
- 516 Keightley, P.D., and Eyre-Walker, A. (2012). Estimating the rate of adaptive molecular evolution when  
517 the evolutionary divergence between species is small. *J. Mol. Evol.* *74*, 61–68.
- 518 Kim, P.M., Lu, L.J., Xia, Y., and Gerstein, M.B. (2006). Relating three-dimensional structures to protein  
519 networks provides evolutionary insights. *Science* *314*, 1938–1941.
- 520 Kondo, S., Vedanayagam, J., Mohammed, J., Eizadshenass, S., Kan, L., Pang, N., Aradhya, R., Siepel,  
521 A., Steinhauer, J., and Lai, E.C. (2017). New genes often acquire male specific functions but rarely  
522 become essential in *Drosophila*. *Genes Dev.* *31*, 1841–1846.
- 523 Kosiol, C., Vinař, T., Da Fonseca, R.R., Hubisz, M.J., Bustamante, C.D., Nielsen, R., and Siepel, A.  
524 (2008). Patterns of positive selection in six mammalian genomes. *PLoS Genet.* *4*, e1000144.
- 525 Langley, C.H., Stevens, K., Cardeno, C., Lee, Y.C.G., Schrider, D.R., Pool, J.E., Langley, S.A., Suarez,  
526 C., Corbett-Detig, R.B., Kolaczkowski, B., et al. (2012). Genomic variation in natural populations of  
527 *Drosophila melanogaster*. *Genetics* *192*, 533–598.
- 528 Lawniczak, M.K.N., and Begun, D.J. (2007). Molecular population genetics of female-expressed mating-  
529 induced serine proteases in *Drosophila melanogaster*. *Mol. Biol. Evol.* *24*, 1944–1951.
- 530 Lazzaro, B.P., Scurman, B.K., and Clark, A.G. (2004). Genetic basis of natural variation in *D.*  
531 *melanogaster* antibacterial immunity. *Science* *303*, 1873–1876.
- 532 Leader, D.P., Krause, S.A., Pandit, A., Davies, S.A., and Dow, J.A.T. (2018). FlyAtlas 2: A new version  
533 of the *Drosophila melanogaster* expression atlas with RNA-Seq, miRNA-Seq and sex-specific data.  
534 *Nucleic Acids Res.* *46*, D809–D815.
- 535 Levin, T.C., and Malik, H.S. (2017). Rapidly evolving Toll-3/4 genes encode male-specific Toll-like



536 receptors in drosophila. *Mol. Biol. Evol.* *34*, 2307–2323.

537 Lin, Y.S., Hsu, W.L., Hwang, J.K., and Li, W.H. (2007). Proportion of solvent-exposed amino acids in a  
538 protein and rate of protein evolution. *Mol. Biol. Evol.* *24*, 1005–1011.

539 Lindblad-Toh, K., Garber, M., Zuk, O., Lin, M.F., Parker, B.J., Washietl, S., Kheradpour, P., Ernst, J.,  
540 Jordan, G., Mauceli, E., et al. (2011). A high-resolution map of human evolutionary constraint using 29  
541 mammals. *Nature* *478*, 476–482.

542 Löytynoja, A. (2014). Phylogeny-aware alignment with PRANK. *Methods Mol. Biol.* *1079*, 155–170.

543 McBride, C.S. (2007). Rapid evolution of smell and taste receptor genes during host specialization in  
544 *Drosophila sechellia*. *Proc. Natl. Acad. Sci. U. S. A.* *104*, 4996–5001.

545 Messer, P.W., and Petrov, D.A. (2013). Frequent adaptation and the McDonald-Kreitman test. *Proc. Natl.*  
546 *Acad. Sci. U. S. A.* *110*, 8615–8620.

547 Mintseris, J., and Weng, Z. (2005). Structure, function, and evolution of transient and obligate protein-  
548 protein interactions. *Proc. Natl. Acad. Sci. U. S. A.* *102*, 10930–10935.

549 Moutinho, A.F., Trancoso, F.F., Dutheil, J.Y., and Zhang, J. (2019). The Impact of Protein Architecture  
550 on Adaptive Evolution. *Mol. Biol. Evol.* *36*, 2013–2028.

551 Mukherjee, S., and Zhang, Y. (2011). Protein-protein complex structure predictions by multimeric  
552 threading and template recombination. *Structure* *19*, 955–966.

553 Newville, M., and Stensitzki, T. (2018). Non-Linear Least-Squares Minimization and Curve-Fitting for  
554 Python. Zenodo.

555 Nielsen, R., Bustamante, C., Clark, A.G., Glanowski, S., Sackton, T.B., Hubisz, M.J., Fledel-Alon, A.,  
556 Tanenbaum, D.M., Civello, D., White, T.J., et al. (2005). A scan for positively selected genes in the  
557 genomes of humans and chimpanzees. *PLoS Biol.* *3*, 0976–0985.

558 Obbard, D.J., Welch, J.J., Kim, K.W., and Jiggins, F.M. (2009). Quantifying adaptive evolution in the  
559 *Drosophila* immune system. *PLoS Genet.* *5*, e1000698.

560 Pál, C., Papp, B., and Hurst, L.D. (2001). Highly expressed genes in yeast evolve slowly. *Genetics* *158*,  
561 927–931.

562 Palmer, W.H., Hadfield, J.D., and Obbard, D.J. (2018). RNA-interference pathways display high rates of  
563 adaptive protein evolution in multiple invertebrates. *Genetics* *208*, 1585–1599.

564 Pazos, F., and Valencia, A. (2008). Protein co-evolution, co-adaptation and interactions. *EMBO J.* *27*,  
565 2648–2655.

566 Pieper, U., Webb, B.M., Barkan, D.T., Schneidman-Duhovny, D., Schlessinger, A., Braberg, H., Yang,  
567 Z., Meng, E.C., Pettersen, E.F., Huang, C.C., et al. (2011). ModBase, a database of annotated comparative  
568 protein structure models, and associated resources. *Nucleic Acids Res.* *39*, D465–D474.

569 Ramsey, D.C., Scherrer, M.P., Zhou, T., and Wilke, C.O. (2011). The relationship between relative

570 solvent accessibility and evolutionary rate in protein evolution. *Genetics* 188, 479–488.

571 Re, S., Oshima, H., Kasahara, K., Kamiya, M., and Sugita, Y. (2019). Encounter complexes and hidden  
572 poses of kinaseinhibitor binding on the free-energy landscape. *Proc. Natl. Acad. Sci. U. S. A.* 116,  
573 18404–18409.

574 Sackton, T.B., Lazzaro, B.P., Schlenke, T.A., Evans, J.D., Hultmark, D., and Clark, A.G. (2007).  
575 Dynamic evolution of the innate immune system in *Drosophila*. *Nat. Genet.* 39, 1461–1468.

576 Schott, R.K., Refvik, S.P., Hauser, F.E., López-Fernández, H., and Chang, B.S.W. (2014). Divergent  
577 positive selection in rhodopsin from lake and riverine cichlid fishes. *Mol. Biol. Evol.* 31, 1149–1165.

578 Shao, Y., Chen, C., Shen, H., He, B.Z., Yu, D., Jiang, S., Zhao, S., Gao, Z., Zhu, Z., Chen, X., et al.  
579 (2019). GenTree, an integrated resource for analyzing the evolution and function of primate-specific  
580 coding genes. *Genome Res.* 29, 682–696.

581 Sironi, M., Cagliani, R., Forni, D., and Clerici, M. (2015). Evolutionary insights into host-pathogen  
582 interactions from mammalian sequence data. *Nat. Rev. Genet.* 16, 224–236.

583 Slodkowicz, G., and Goldman, N. (2020). Integrated structural and evolutionary analysis reveals common  
584 mechanisms underlying adaptive evolution in mammals. *Proc. Natl. Acad. Sci. U. S. A.* 117, 5977–5986.

585 Smith, N.G.C., and Eyre-Walker, A. (2002). Adaptive protein evolution in *Drosophila*. *Nature* 415, 1022–  
586 1024.

587 Song, Y., Dimaio, F., Wang, R.Y.R., Kim, D., Miles, C., Brunette, T., Thompson, J., and Baker, D.  
588 (2013). High-resolution comparative modeling with RosettaCM. *Structure* 21, 1735–1742.

589 Storz, J.F., and Kelly, J.K. (2008). Effects of Spatially Varying Selection on Nucleotide Diversity and  
590 Linkage Disequilibrium: Insights From Deer Mouse Globin Genes. *Genetics* 180, 367–379.

591 Svetec, N., Cridland, J.M., Zhao, L., and Begun, D.J. (2016). The Adaptive Significance of Natural  
592 Genetic Variation in the DNA Damage Response of *Drosophila melanogaster*. *PLoS Genet.* 12,  
593 e1005869.

594 Szklarczyk, D., Gable, A.L., Lyon, D., Junge, A., Wyder, S., Huerta-Cepas, J., Simonovic, M., Doncheva,  
595 N.T., Morris, J.H., Bork, P., et al. (2019). STRING v11: Protein-protein association networks with  
596 increased coverage, supporting functional discovery in genome-wide experimental datasets. *Nucleic  
597 Acids Res.* 47, D607–D613.

598 Tang, C., Iwahara, J., and Clore, G.M. (2006). Visualization of transient encounter complexes in protein-  
599 protein association. *Nature* 444, 383–386.

600 Thurmond, J., Goodman, J.L., Strelets, V.B., Attrill, H., Gramates, L.S., Marygold, S.J., Matthews, B.B.,  
601 Millburn, G., Antonazzo, G., Trovisco, V., et al. (2019). FlyBase 2.0: The next generation. *Nucleic Acids  
602 Res.* 47, D759–D765.

603 Uricchio, L.H., Petrov, D.A., and Enard, D. (2019). Exploiting selection at linked sites to infer the rate

604 and strength of adaptation. *Nat. Ecol. Evol.* 3, 977–984.

605 Uversky, V.N. (2019). Intrinsically disordered proteins and their “Mysterious” (meta)physics. *Front.*  
606 *Phys.* 7, 10.

607 Wang, S., Li, W., Liu, S., and Xu, J. (2016). RaptorX-Property: a web server for protein structure  
608 property prediction. *Nucleic Acids Res.* 44, W430–W435.

609 Wu, D.D., Wang, G.D., Irwin, D.M., and Zhang, Y.P. (2009). A profound role for the expansion of  
610 trypsin-like serine protease family in the evolution of hematophagy in mosquito. *Mol. Biol. Evol.* 26,  
611 2333–2341.

612 Xia, B., Yan, Y., Baron, M., Wagner, F., Barkley, D., Chiodin, M., Kim, S.Y., Keefe, D.L., Alukal, J.P.,  
613 Boeke, J.D., et al. (2020). Widespread Transcriptional Scanning in the Testis Modulates Gene Evolution  
614 Rates. *Cell* 180, 248–262.e21.

615 Yan, J., and Kurgan, L. (2017). DRNAPred, fast sequence-based method that accurately predicts and  
616 discriminates DNA- and RNA-binding residues. *Nucleic Acids Res.* 45.

617 Yanai, I., Benjamin, H., Shmoish, M., Chalifa-Caspi, V., Shklar, M., Ophir, R., Bar-Even, A., Horn-  
618 Saban, S., Safran, M., Domany, E., et al. (2005). Genome-wide midrange transcription profiles reveal  
619 expression level relationships in human tissue specification. *Bioinformatics* 21, 650–659.

620 Yang, Z. (2007). PAML 4: Phylogenetic analysis by maximum likelihood. *Mol. Biol. Evol.* 24, 1586–  
621 1591.

622 Yang, L., Zhang, Z., and He, S. (2016). Both Male-Biased and Female-Biased Genes Evolve Faster in  
623 Fish Genomes. *Genome Biol. Evol.* 8, 3433–3445.

624 Yang, Z., Wong, W.S.W., and Nielsen, R. (2005). Bayes empirical Bayes inference of amino acid sites  
625 under positive selection. *Mol. Biol. Evol.* 22, 1107–1118.

626 Zhang, J., and He, X. (2005). Significant impact of protein dispensability on the instantaneous rate of  
627 protein evolution. *Mol. Biol. Evol.* 22, 1147–1155.

628 Zhang, J., and Yang, J.R. (2015). Determinants of the rate of protein sequence evolution. *Nat. Rev. Genet.*  
629 16, 409–420.

630 Zhang, Y.E., Vibranovski, M.D., Krinsky, B.H., and Long, M. (2010). Age-dependent chromosomal  
631 distribution of male-biased genes in *Drosophila*. *Genome Res.* 20, 1526–1533.

632 Zheng, N., Schulman, B.A., Song, L., Miller, J.J., Jeffrey, P.D., Wang, P., Chu, C., Koepp, D.M., Elledge,  
633 S.J., Pagano, M., et al. (2002). Structure of the Cul1-Rbx1-Skp1-F boxSkp2 SCF ubiquitin ligase  
634 complex. *Nature* 416, 703–709.

635

636

637

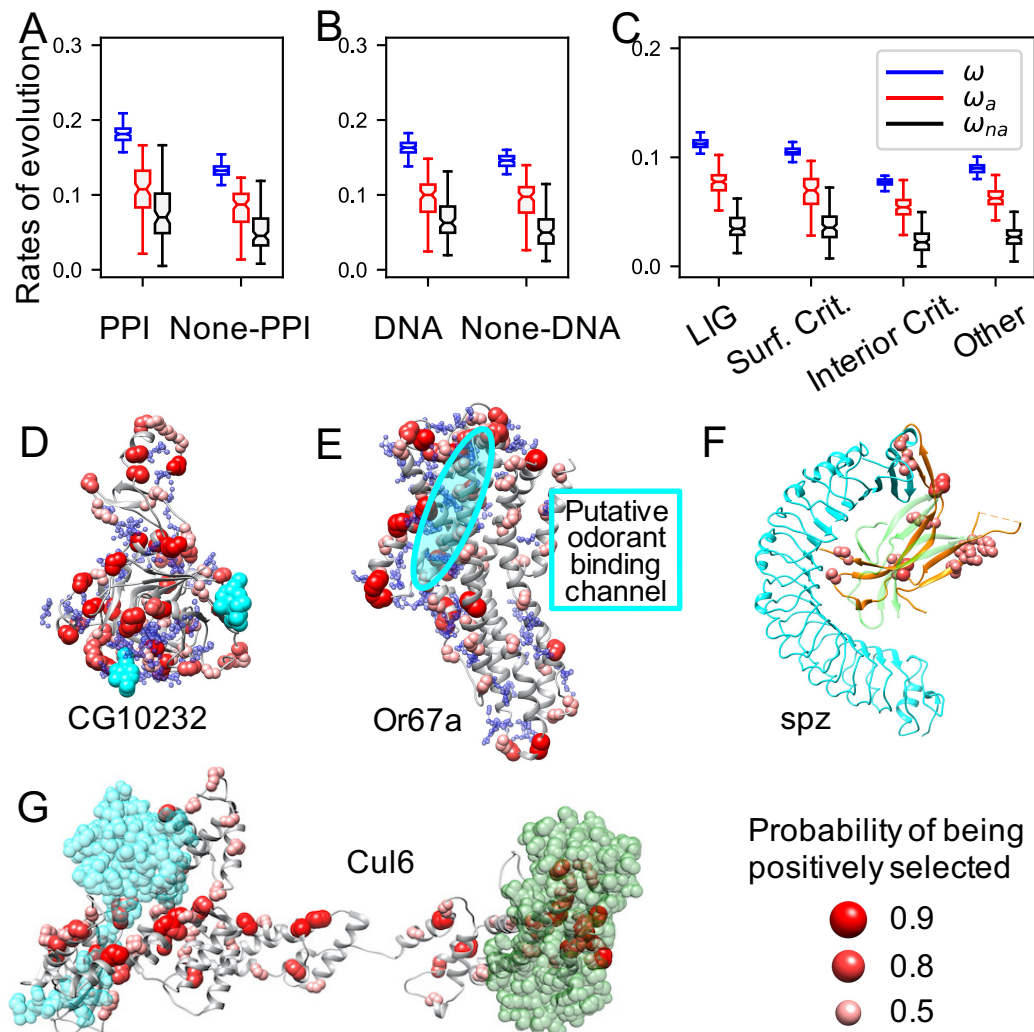

638  
 639 Figure 1. Adaptive evolution in molecular interaction sites. Protein-protein interaction sites (A), DNA  
 640 binding sites (B) and putative ligand binding sites (C) show higher adaptation rates than none binding  
 641 sites. Examples of positive selection around molecular interaction sites in high quality structural models  
 642 of CG10232 (D), Or67a (E), spz (F), and Cul6 (G). Except for spz (PDB code 3e07), the other proteins  
 643 are obtained from SWISS model repository. Putative ligand binding pockets of CG10232 (D) and Or67a  
 644 (E) are shown in blue spheres. Ligands including interacting proteins are shown in cyan or green: NAG of  
 645 CG10232 in cyan (D), Toll receptor of spz in cyan (F), RING-box protein in cyan and F-box protein in  
 646 green for Cul6 (G). The putative odorant binding channel of Or67a is highlighted in cyan circle (E). The  
 647 ligand poses in (D, F and G) are obtained by superimposition from structure 2XXL, 4BV4 and 1LDK,  
 648 respectively.  
 649  
 650

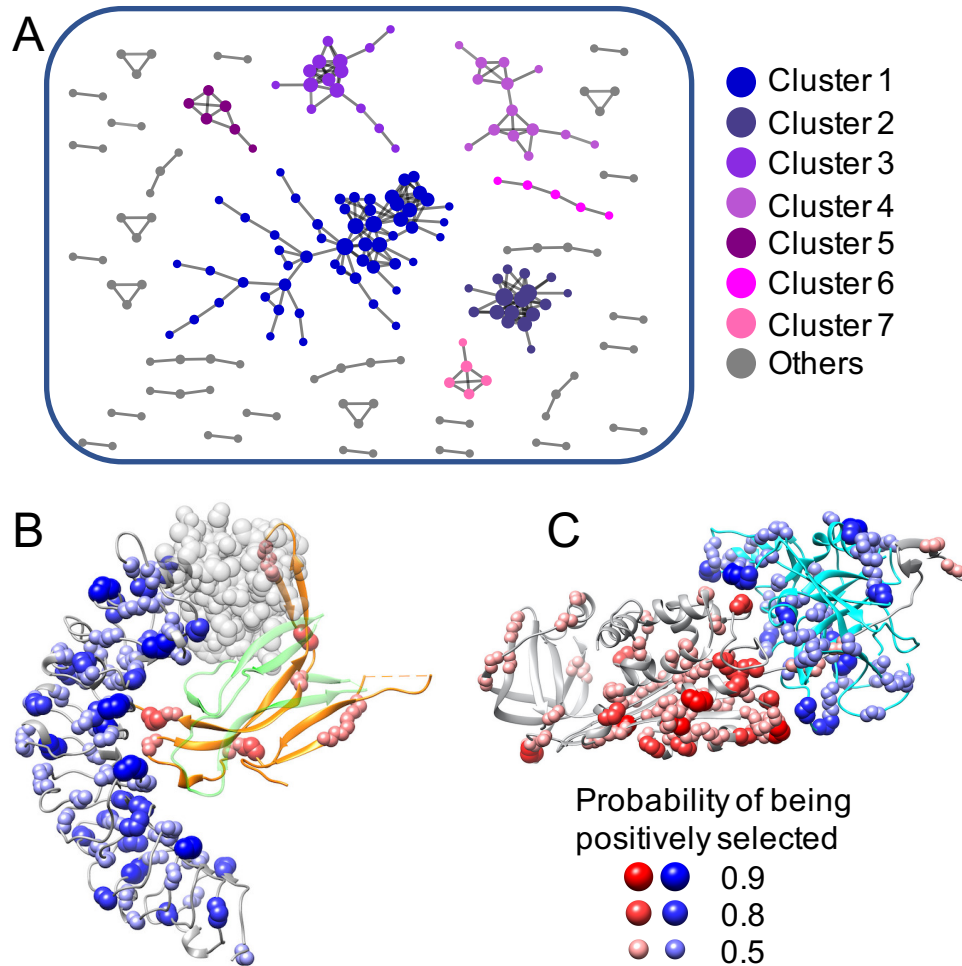

651  
652 Figure 2. Co-adaptation of fast-adaptive proteins. (A) Sub-clusters of PPI networks of fast-adaptive  
653 proteins. Only proteins with at least one partner were shown. Examples of molecular interactions that  
654 might regulate co-adaptation in fast-adaptive proteins: (B) Toll-4 (gray) and spz (orange, with green  
655 representing the other spz monomer), (C) Spn28Db (gray, serine protease inhibitor 28Db) and CG18563  
656 (cyan, with Go term “serine-type endopeptidase activity”). A putative N-terminus (transparent beads) of  
657 Toll-4 were built by superimposition from 4LXR, since the N-terminus were missing in the structural  
658 model. Complex structural model of Spn28Db and CG18563 was inferred from 1EZK.  
659

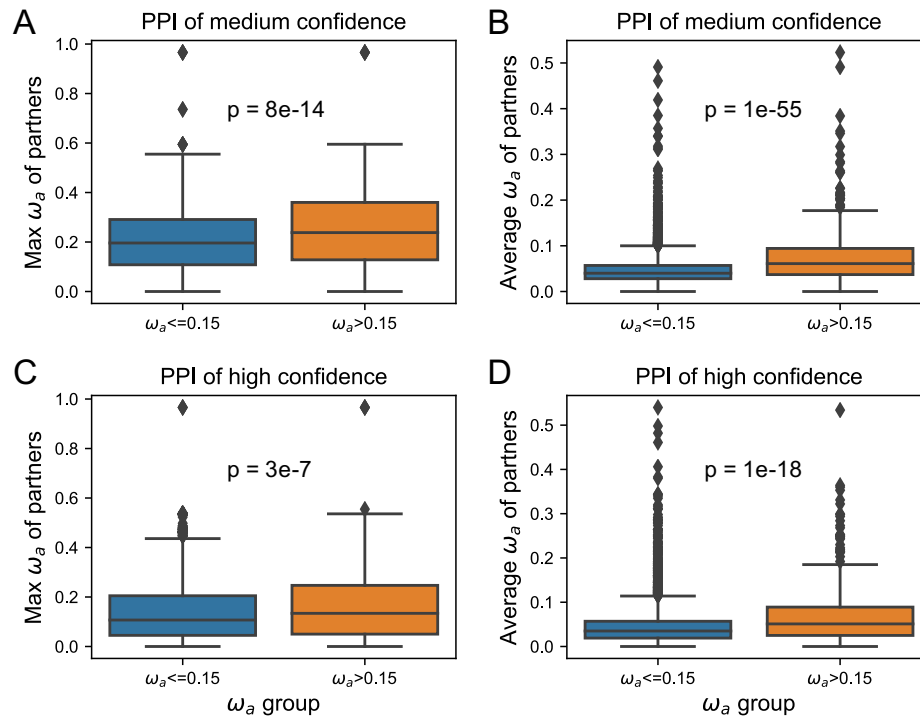

660  
661  
662  
663  
664  
665  
666

Figure 3. Co-adaptation of PPIs in *D. melanogaster*. For fast-adaptive proteins, adaptation rates of their partners (orange box plot) are significantly larger compared to slow adaptive proteins (blue box plot). Max  $\omega_a$  of protein partners are shown in (A and C) and averaged  $\omega_a$ , of protein partners are shown in (B and D). PPI from STRING with median confidence (combined score larger than 0.4) are shown in (A and B), and PPI with high confidence (combined score larger than 0.7) are shown in (C and D).

667

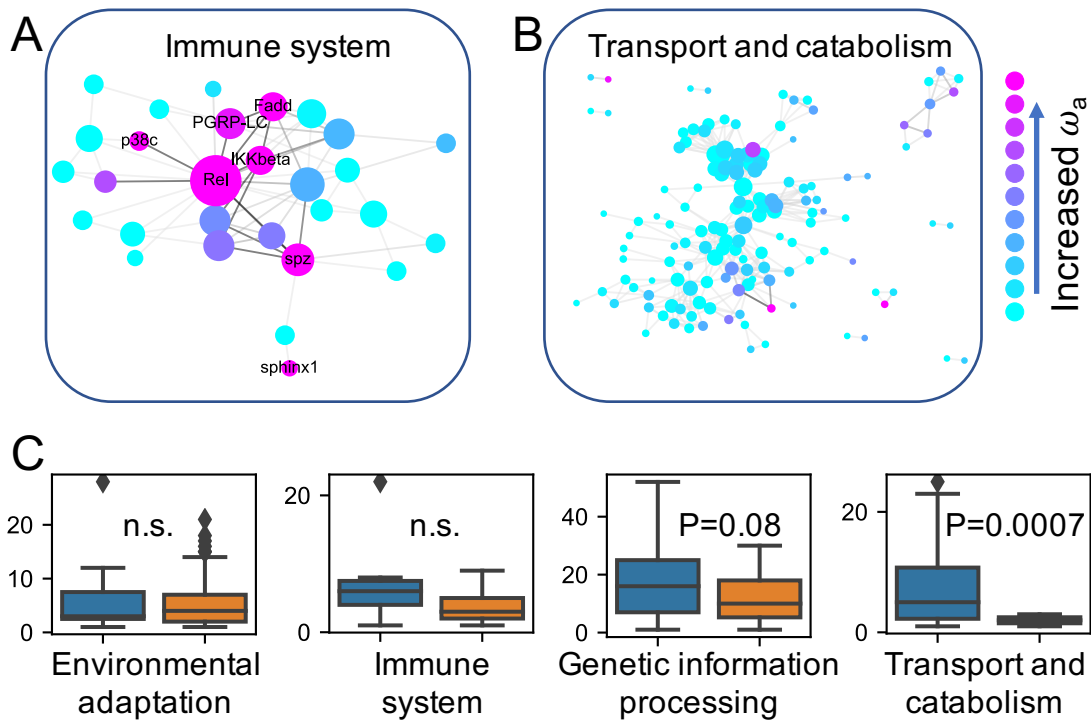

668  
669  
670  
671  
672  
673  
674  
675  
676  
677  
678  
679  
680  
681  
682  
683  
684  
685  
686  
687  
688  
689  
690  
691  
692  
693  
694  
695

**Figure 4.** Rates of protein sequence adaptive evolution in the PPI network of different functional pathways. The PPI networks showed the adaptive evolution in immune system (A) and transport and catabolism (B). (C) In pathways that are hotspots of adaptive evolution, fast-adaptive proteins can act as central nodes, while in conserved pathways, fast-adaptive proteins are often at the periphery of the PPI network.

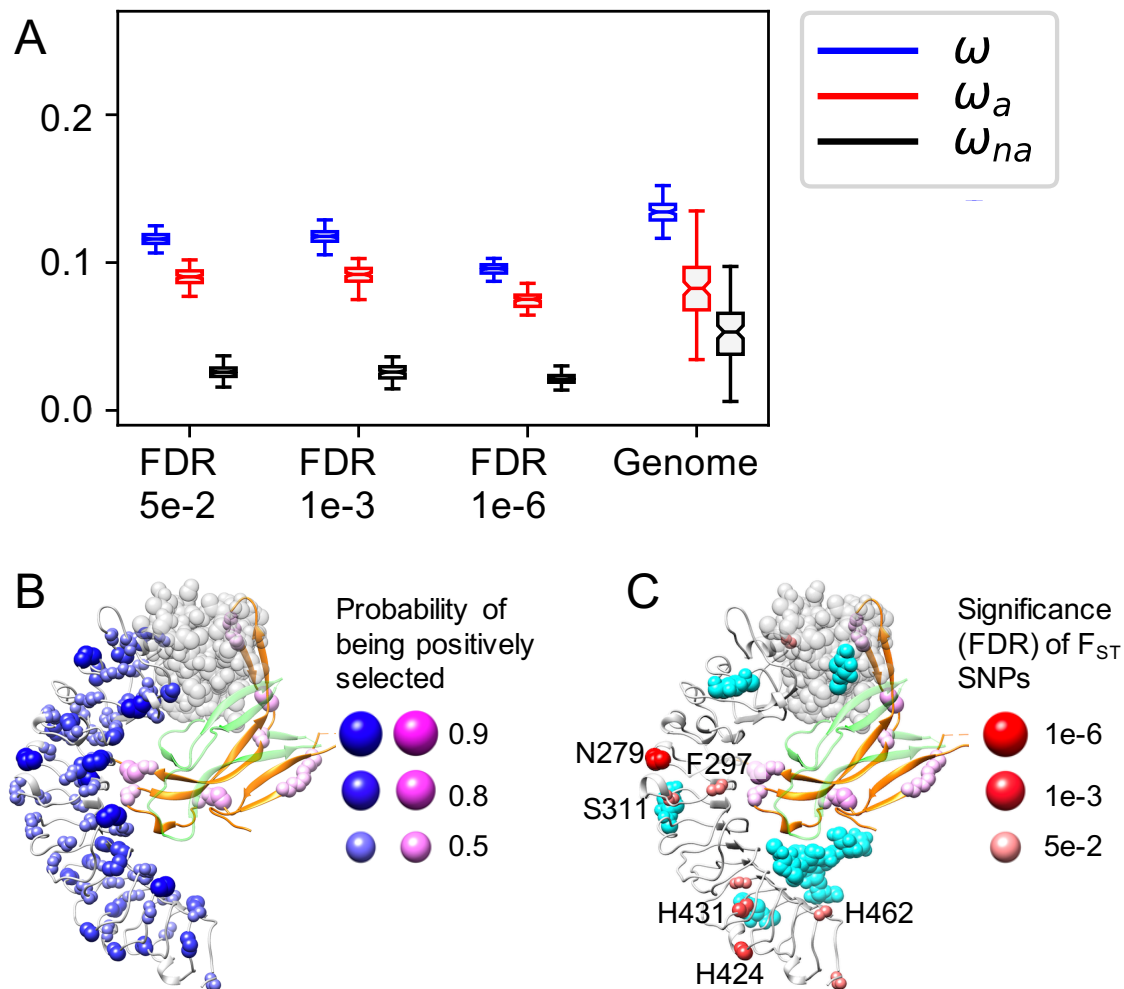

696  
697  
698  
699  
700  
701  
702  
703  
704  
705

Figure 5. Adaptive evolution in significant nonsynonymous  $F_{ST}$  SNPs. (A) The significant SNPs at different FDR cutoffs all show much higher proportions of adaptation than genome-wide expectation. (B) Positive selections in Toll-4 and Spatzle, related to Fig. 2B. (C) Significant nonsynonymous  $F_{ST}$  SNPs in Toll-4. Ligands are shown in cyan by superimposing crystal structure of Toll-Spatzle (PDB code 4BV4) on to Toll-4 structural model. N279, H431 are both highly differentiated (FDR  $3e-7$  and  $3e-6$ ) and positively selected (both probability at  $p=0.9$ ). Other highly differentiated sites, F297, S311, H424, H431 and H462 are located near ligand binding sites or positively selected sites.
